# Supplementary material for: Yet More “Weeds” in the Garden: Fungal Novelties from Nests of Leaf-Cutting Ants
Source: PubMed Central journal article supplement (PMC3869688; doi:10.1371/journal.pone.0082265), 2013-12-20
Supplement: pone.0082265.s006.pdf [file pone.0082265.s006.pdf]

**Table S1.** Sources of fungal species and GenBank sequences for which novel sequences were generated in this study.

| Species                          | Culture number          | Origin                        | Host / substrate                                          | GenBank Accession Number |          |               |
|----------------------------------|-------------------------|-------------------------------|-----------------------------------------------------------|--------------------------|----------|---------------|
|                                  |                         |                               |                                                           | ITS                      | LSU      | EF1- $\alpha$ |
| <i>Escovopsioides nivea</i>      | CBS 135749, J6          | Brazil: Minas Gerais          | <i>Acromyrmex subterraneus subterraneus</i> fungal garden | JQ815078                 | JQ855716 | JQ855713      |
| <i>Escovopsis aspergilloides</i> | CBS 423.93, DAOM 216382 | Trinidad and Tobago: Trinidad | Nest of <i>Trachymyrmex ruthae</i>                        | KF293287                 | KF293283 | KF293277      |
| <i>Escovopsis lentecrescens</i>  | CBS 135750, J9          | Brazil: Minas Gerais          | <i>Acromyrmex subterraneus subterraneus</i> fungal garden | JQ815079                 | JQ855717 | JQ855714      |
| <i>Escovopsis microspora</i>     | CBS 135751, J10         | Brazil: Minas Gerais          | <i>Acromyrmex subterraneus molestans</i> fungal garden    | JQ815076                 | KF293284 | —             |
| <i>Escovopsis moelleri</i>       | CBS 135748, J5          | Brazil: Minas Gerais          | <i>Acromyrmex subterraneus molestans</i> fungal garden    | JQ815077                 | JQ855715 | JQ855712      |
| <i>Escovopsis weberi</i>         | ATCC 64542              | Brazil: Minas Gerais          | 'Carpenter ant' fungal mass                               | KF293285                 | KF293281 | KF293275      |
| <i>Escovopsis weberi</i>         | CBS 810.71              | Brazil                        | Ant nest                                                  | KF293286                 | KF293282 | KF293276      |
