# Supplementary material for: Yet More “Weeds” in the Garden: Fungal Novelties from Nests of Leaf-Cutting Ants
Source: PubMed Central journal article supplement (PMC3869688; doi:10.1371/journal.pone.0082265), 2013-12-20
Supplement: pone.0082265.s007.pdf [file pone.0082265.s007.pdf]

Table S2. Number of *Escovopsis* and *Escovopsioides* species isolated from individual *Acromyrmex* colonies. MB = Mata da Biologia (UFV campus); Rep = Represa UFV (UFV campus); MP = Mata do Paraíso.

| Colony identity                             | Mutualistic fungus garden                  |                                                                                     | Total |
|---------------------------------------------|--------------------------------------------|-------------------------------------------------------------------------------------|-------|
|                                             | Top                                        | Bottom                                                                              |       |
| <i>A. niger</i> 1 (MB)                      | -                                          | <i>E. nivea</i><br><i>E. microspora</i>                                             | 2     |
| <i>A. niger</i> 2 (MP)                      | <i>E. nivea</i>                            | -                                                                                   | 1     |
| <i>A. subterraneus molestans</i> 1 (MB)     | -                                          | -                                                                                   | 0     |
| <i>A. subterraneus molestans</i> 2 (MB)     | -                                          | -                                                                                   | 0     |
| <i>A. subterraneus molestans</i> 3 (MB)     | <i>E. nivea</i>                            | <i>E. moelleri</i><br><i>E. nivea</i><br><i>E. microspora</i><br><i>E. moelleri</i> | 3     |
| <i>A. subterraneus molestans</i> 4 (MB)     | <i>E. moelleri</i><br><i>E. microspora</i> | <i>E. nivea</i><br><i>E. lentecrescens</i>                                          | 4     |
| <i>A. subterraneus molestans</i> 5 (Rep)    | <i>E. microspora</i>                       | <i>E. microspora</i>                                                                | 1     |
| <i>A. subterraneus molestans</i> 6 (Rep)    | -                                          | <i>E. microspora</i>                                                                | 1     |
| <i>A. subterraneus molestans</i> 7 (Rep)    | -                                          | <i>E. nivea</i>                                                                     | 1     |
| <i>A. subterraneus molestans</i> 8 (Rep)    | <i>E. microspora</i>                       | -                                                                                   | 1     |
| <i>A. subterraneus molestans</i> 9 (Rep)    | -                                          | <i>E. nivea</i>                                                                     | 1     |
| <i>A. subterraneus molestans</i> 10 (MP)    | -                                          | <i>E. moelleri</i><br><i>E. microspora</i>                                          | 2     |
| <i>A. subterraneus molestans</i> 11 (MP)    | <i>E. nivea</i>                            | <i>E. moelleri</i><br><i>E. microspora</i>                                          | 3     |
| <i>A. subterraneus subterraneus</i> 1 (MB)  | <i>E. nivea</i>                            | -                                                                                   | 1     |
| <i>A. subterraneus subterraneus</i> 2 (MB)  | -                                          | -                                                                                   | 0     |
| <i>A. subterraneus subterraneus</i> 3 (MB)  | -                                          | <i>E. nivea</i>                                                                     | 1     |
| <i>A. subterraneus subterraneus</i> 4 (MB)  | -                                          | <i>E. moelleri</i>                                                                  | 1     |
| <i>A. subterraneus subterraneus</i> 5 (Rep) | -                                          | <i>E. nivea</i>                                                                     | 1     |
| <i>A. subterraneus subterraneus</i> 6 (Rep) | -                                          | <i>E. microspora</i>                                                                | 1     |
| <i>A. subterraneus subterraneus</i> 7 (Rep) | <i>E. nivea</i>                            | -                                                                                   | 1     |
| <i>A. subterraneus subterraneus</i> 8 (MP)  | -                                          | -                                                                                   | 0     |
| <i>A. subterraneus subterraneus</i> 9 (MP)  | -                                          | <i>E. nivea</i>                                                                     | 1     |
| <i>A. subterraneus subterraneus</i> 10 (MP) | <i>E. nivea</i>                            | <i>E. nivea</i>                                                                     | 1     |
| <i>A. subterraneus subterraneus</i> 11 (MP) | <i>E. lentecrescens</i>                    | <i>E. nivea</i><br><i>E. lentecrescens</i>                                          | 2     |
| <i>A. subterraneus subterraneus</i> 12 (MP) | -                                          | <i>E. microspora</i>                                                                | 1     |
